# Supplementary material for: Multi-Cancer PRS Constellation Model for Cancer Risk Prediction
Source: bioRxiv or medRxiv preprint supplement (doi:10.1101/2024.10.17.24315686), 2024-10-18
Supplement: Supplementary file [file media-2.pdf]

**Supplementary Table 2.** Overview of the relevant information regarding genotyping, quality control, and imputation of the projects comprising the GenRisk dataset. The following columns are included: Project name: The name of the project. Samples: The number of samples used in the project. Genotype date: The date of genotyping. Array: The genotyping array used. SNPs included: The number of SNP included in the array. SNPs-QC: The number of SNP after quality control (QC). MCC-Spain samples: the number of samples belonging to MCC Spain. Control: The number of control samples. Case: The number of case samples. First author: The primary author of the reference article. Link to publication: A link to the publication related to the project.

| Project name: | Samples |     |            |         |         |          | MCC-Spain samples | Genotype date: | Array:                                  | SNPs markers included | SNPs-QC | Project name:         | First author                        | Link to publication                                                                                                                                   |
|---------------|---------|-----|------------|---------|---------|----------|-------------------|----------------|-----------------------------------------|-----------------------|---------|-----------------------|-------------------------------------|-------------------------------------------------------------------------------------------------------------------------------------------------------|
|               | Breast  | CLL | Colorectal | Control | Gastric | Prostate |                   |                |                                         |                       |         |                       |                                     |                                                                                                                                                       |
| CRCGen        | 0       | 0   | 541        | 485     | 0       | 0        | 1026              | 2016           | Infinium Oncoarray-500 k                | 533631                | 451568  | CRCGen                | Mireia Obón-Santacana <i>et al.</i> | <a href="https://www.ncbi.nlm.nih.gov/pmc/articles/PMC8574048/">https://www.ncbi.nlm.nih.gov/pmc/articles/PMC8574048/</a>                             |
| GASTRIC       | 0       | 0   | 0          | 0       | 225     | 0        | 225               | 2016           | Illumina Infinium Omni2.5 Exome v1.3    | 2612357               | 2592364 | CNIO                  | Stephanie L Schmit <i>et al.</i>    | <a href="https://academic.oup.com/jnci/article/111/2/146/5039592?login=false">https://academic.oup.com/jnci/article/111/2/146/5039592?login=false</a> |
| PRACTICAL     | 0       | 0   | 0          | 402     | 0       | 527      | 929               | 2018           | Infinium Oncoarray-500 k                | 533631                | 485120  | PRACTICAL             | Schumacher FR <i>et al.</i>         | <a href="https://www.nature.com/articles/s41588-018-0142-8">https://www.nature.com/articles/s41588-018-0142-8</a>                                     |
| CNIO          | 1179    | 390 | 890        | 1977    | 101     | 386      | 4923              | 2020/2021      | Illumina Global Screening Array-24 v3.0 | 660945                | 657992  | CNIO/CRCGen/PRACTICAL | National Cancer Institute           | <a href="https://epi.grants.cancer.gov/gameon/">https://epi.grants.cancer.gov/gameon/</a>                                                             |

7103

**Supplementary Table 3. Evaluation and Selection of PRSs for Cancer and Associated Risk Traits.** List of PRS calculated and type of cancer associated. PRS evaluation: Assessment of PRS predictive power for corresponding trait.

| #  | Trait Name                                                                | Risk factor of | PRS evaluation |          |
|----|---------------------------------------------------------------------------|----------------|----------------|----------|
|    |                                                                           |                | Test           | p.value  |
| 1  | Colorectal cancer                                                         | CRC            | t.test         | 8.0E-160 |
| 2  | Breast cancer                                                             | BC             | t.test         | 1.8E-226 |
| 3  | Prostate cancer                                                           | PC             | t.test         | <0.0001  |
| 4  | Alcohol intake frequency                                                  | CRC/BC/PC      | ANOVA          | <0.0001  |
| 5  | Alcohol consumed                                                          | CRC/BC/PC      | t.test         | 1.1E-239 |
| 6  | Freq. of drinking alcohol                                                 | CRC/BC/PC      | ANOVA          | <0.0001  |
| 7  | Average weekly alcohol consumption (beer and cider)                       | CRC/BC/PC      | ANOVA          | <0.0001  |
| 8  | Smoking status                                                            | CRC/BC/PC      | ANOVA          | <0.0001  |
| 9  | Number of cigarettes previously smoked daily (current cigar/pipe smokers) | CRC/BC/PC      | ANOVA          | <0.0001  |
| 10 | Never Smoker                                                              | CRC/BC/PC      | ANOVA          | <0.0001  |
| 11 | Weight                                                                    | CRC/BC/PC      | Pearson        | <0.0001  |
| 12 | BMI (body mass index)                                                     | CRC/BC/PC      | Pearson        | <0.0001  |
| 13 | Waist circumference                                                       | CRC/BC/PC      | Pearson        | <0.0001  |
| 14 | Hip circumference                                                         | CRC/BC/PC      | Pearson        | <0.0001  |
| 15 | Standing height                                                           | CRC/BC/PC      | Pearson        | <0.0001  |
| 16 | Body fat %                                                                | CRC/BC/PC      | Pearson        | <0.0001  |
| 17 | Waist-hip ratio                                                           | CRC/BC/PC      | Pearson        | <0.0001  |
| 18 | Number of days/week walked 10+ minutes                                    | CRC/BC/PC      | Pearson        | 4.5E-13  |
| 19 | Duration of Walks                                                         | CRC/BC/PC      | Pearson        | <0.0001  |
| 20 | Fresh fruit intake                                                        | CRC/BC/PC      | Pearson        | <0.0001  |
| 21 | Cooked vegetable intake                                                   | CRC/BC/PC      | Pearson        | <0.0001  |
| 22 | Oily fish intake                                                          | CRC/BC/PC      | Pearson        | <0.0001  |
| 23 | Processed meat intake                                                     | CRC/BC/PC      | Pearson        | <0.0001  |
| 24 | Beef intake                                                               | CRC/BC/PC      | Pearson        | 2.9E-66  |
| 25 | Poultry intake                                                            | CRC/BC/PC      | Pearson        | <0.0001  |

|    |                                                                  |           |         |           |
|----|------------------------------------------------------------------|-----------|---------|-----------|
| 26 | Milk type: Skimmed                                               | CRC/BC/PC | Pearson | 6.1E-50   |
| 27 | Bread intake                                                     | CRC/BC/PC | Pearson | <0.0001   |
| 28 | Cereal intake                                                    | CRC/BC/PC | Pearson | <0.0001   |
| 29 | Coffee intake                                                    | CRC/BC/PC | Pearson | 1.4E-08   |
| 30 | Coffee consumed                                                  | CRC/BC/PC | t.test  | 7.6E-23   |
| 31 | Glucosamine                                                      | CRC/BC/PC | ANOVA   | <0.0001   |
| 32 | Taking other prescription medications                            | CRC/BC/PC | t.test  | <0.0001   |
| 33 | Nº of medications taken (Number of treatments/medications taken) | CRC/BC/PC | Pearson | <0.0001   |
| 34 | Paracetamol (Treatment/medication code)                          | CRC/BC/PC | t.test  | 2.55E-257 |
| 35 | Ibuprofen (e.g. Nurofen)                                         | CRC/BC/PC | t.test  | 2.75E-73  |
| 36 | Aspirin                                                          | CRC/BC/PC | t.test  | <0.0001   |
| 37 | Diabetes (Diabetes diagnosis )                                   | CRC/BC/PC | t.test  | <0.0001   |
| 38 | Age diabetes diagnosed                                           | CRC/BC/PC | Pearson | 1.2E-57   |
| 39 | Essential hypertension                                           | CRC/BC/PC | Pearson | 3.9E-49   |
| 40 | Cholesterol (biomarker)                                          | CRC/BC/PC | Pearson | <0.0001   |
| 41 | HDL cholesterol (biomarker)                                      | CRC/BC/PC | Pearson | <0.0001   |
| 42 | LDL cholesterol (biomarker)                                      | CRC/BC/PC | Pearson | <0.0001   |
| 43 | Crohns disease (self-reported)                                   | CRC       | t.test  | 2.5E-34   |
| 44 | Ulcerative colitis (self-reported)                               | CRC       | t.test  | 1.9E-51   |
| 45 | Diverticular disease/diverticulitis (self-reported)              | CRC       | t.test  | 7.0E-28   |
| 46 | Malabsorption/coeliac disease (self-reported)                    | CRC       | t.test  | 3.4E-80   |
| 47 | Pulse rate (AR)                                                  | CRC/BC/PC | Pearson | <0.0001   |
| 48 | Uterine fibroids                                                 | BC        | t.test  | 1.8E-22   |
| 49 | Age when periods started (menarche)                              | BC        | Pearson | <0.0001   |
| 50 | Age at menopause (last menstrual period)                         | BC        | Pearson | <0.0001   |
| 51 | Length of menstrual cycle                                        | BC        | Pearson | 2.0E-16   |
| 52 | Number of live births                                            | BC        | Pearson | <0.0001   |
| 53 | Hyperplasia of prostate                                          | PC        | t.test  | 1.5E-17   |
| 54 | Enlarged prostate                                                | PC        | t.test  | 1.0E-38   |
| 55 | Vitamin D (nmol/L)                                               | CRC/BC/PC | Pearson | <0.0001   |
| 56 | Glucose(mmol/L)                                                  | CRC/BC/PC | Pearson | <0.0001   |
| 57 | Red blood cell count (10 <sup>12</sup> cells/Litre.)             | CRC/BC/PC | Pearson | <0.0001   |
| 58 | Platelet count (10 <sup>9</sup> cells/Litre)                     | CRC/BC/PC | Pearson | <0.0001   |

|    |                                                                   |           |         |         |
|----|-------------------------------------------------------------------|-----------|---------|---------|
| 59 | Lymphocyte count                                                  | CRC/BC/PC | Pearson | <0.0001 |
| 60 | Monocyte count                                                    | CRC/BC/PC | Pearson | <0.0001 |
| 61 | globulina de transport de les hormones sexuals (variable "SHBG"). | BC        | Pearson | <0.0001 |
| 62 | Testosterone (Only in females)                                    | BC        | Pearson | <0.0001 |
| 63 | Testosterone (male only)                                          | PC        | Pearson | <0.0001 |

---

---

**Supplementary Table 4.** Presents predictive performance metrics for CRC, BC, and PC prediction models, including final models and 10-fold cross-validation results.

| PRS model | Cohort   | AUC  | 95% CI      | p.value* |
|-----------|----------|------|-------------|----------|
| CRC       | bn_model | 0.74 | 0.72 - 0.76 |          |
|           | cv_f10   | 0.73 | 0.72 - 0.74 | 0.27     |
| BC        | bn_model | 0.65 | 0.63 - 0.67 |          |
|           | cv_f10   | 0.65 | 0.64 - 0.66 | 0.95     |
| PC        | bn_model | 0.77 | 0.76 - 0.79 |          |
|           | cv_f10   | 0.77 | 0.76 - 0.77 | 0.52     |

\* p.value bn\_model vs cross validations

**Supplementary Table 5. Sex and age characteristics of the GenRisk study participants.** CRC: Colorectal cancer; BC: Breast cancer; PC: Prostate cancer

|                    |          | CRC         |          | BC          |          | PC          |          |
|--------------------|----------|-------------|----------|-------------|----------|-------------|----------|
|                    |          | Control (%) | Case (%) | Control (%) | Case (%) | Control (%) | Case (%) |
| <b>Total</b>       |          | 1977        | 890      | 1334        | 1179     | 862         | 386      |
|                    |          | 68.96       | 31.04    | 53.1        | 46.9     | 69.1        | 30.9     |
| <b>Sex</b>         | Female   | 56.5        | 36.9     | 100         | 100      |             |          |
|                    | Male     | 43.5        | 63.1     |             |          | 100         | 100      |
| <b>Age (years)</b> | ≤45      | 12.3        | 3.4      | 18.5        | 20.3     | 4.1         | 0.3      |
|                    | (45, 55] | 18.6        | 13.8     | 23.9        | 30.3     | 11.5        | 9.1      |
|                    | (55,65]  | 26.2        | 28.5     | 21.7        | 26.6     | 31.0        | 42.7     |
|                    | >65      | 42.9        | 54.3     | 35.9        | 22.8     | 53.5        | 47.9     |
|                    | Median   | 64          | 67       | 59          | 55       | 66          | 65       |
